# Supplementary material for: Clinical profiling of specific diagnostic subgroups of women with chronic pelvic pain
Source: PubMed Central journal article supplement (PMC10266100; doi:10.3389/frph.2023.1140857), 2023-05-30
Supplement: Table6.pdf [file Table6.pdf]

|                                | EAP |      | EABP |      | BPS |      | PP |      |
|--------------------------------|-----|------|------|------|-----|------|----|------|
|                                | N   | %    | N    | %    | N   | %    | N  | %    |
| <b>Pain interference with:</b> |     |      |      |      |     |      |    |      |
| Work or school                 |     |      |      |      |     |      |    |      |
| Low                            | 19  | 16.1 | 12   | 13.8 | 7   | 17.5 | 13 | 31.7 |
| Medium                         | 16  | 13.6 | 20   | 23   | 8   | 20   | 4  | 9.8  |
| High                           | 52  | 44.1 | 46   | 52.9 | 13  | 32.5 | 8  | 19.5 |
| Daily activities at home       |     |      |      |      |     |      |    |      |
| Low                            | 26  | 22.2 | 12   | 13.6 | 9   | 22.5 | 10 | 24.4 |
| Medium                         | 23  | 19.7 | 22   | 25   | 9   | 22.5 | 8  | 19.5 |
| High                           | 47  | 40.2 | 50   | 56.8 | 14  | 35   | 8  | 19.5 |
| Sleep                          |     |      |      |      |     |      |    |      |
| Low                            | 29  | 25.4 | 15   | 16.7 | 9   | 22.5 | 11 | 27.5 |
| Medium                         | 24  | 21.1 | 17   | 18.9 | 6   | 15   | 7  | 17.5 |
| High                           | 36  | 31.6 | 55   | 61.1 | 18  | 45   | 7  | 17.5 |
| Sexual Intercourse             |     |      |      |      |     |      |    |      |
| Low                            | 15  | 12.9 | 4    | 4.7  | 5   | 12.8 | 6  | 14.6 |
| Medium                         | 12  | 10.3 | 5    | 5.8  | 5   | 12.8 | 6  | 14.6 |
| High                           | 38  | 32.8 | 52   | 60.5 | 18  | 46.2 | 7  | 17.1 |
| Exercise/sports                |     |      |      |      |     |      |    |      |
| Low                            | 23  | 19.5 | 9    | 10.1 | 10  | 25.6 | 16 | 39   |
| Medium                         | 25  | 21.2 | 17   | 19.1 | 2   | 5.1  | 5  | 12.2 |
| High                           | 52  | 44.1 | 50   | 56.2 | 19  | 48.7 | 7  | 17.1 |
| Social activities              |     |      |      |      |     |      |    |      |
| Low                            | 31  | 26.7 | 15   | 17.4 | 10  | 25.6 | 14 | 34.1 |
| Medium                         | 20  | 17.2 | 16   | 18.6 | 9   | 23.1 | 6  | 14.6 |
| High                           | 42  | 36.2 | 49   | 57   | 13  | 33.3 | 7  | 17.1 |
